# Supplementary material for: Mechanism of the hydrocarbon resistance of selective catalytic reduction catalysts supported on different zeolites
Source: Royal Society of Chemistry journal article supplement (doi:10.1039/d0cy02132f), 2021-01-01
Supplement: d0cy02132f1.pdf [file d0cy02132f1.pdf]

*Supplementary Material for*

**Mechanism study of the hydrocarbon resistance of selective catalytic reduction  
catalysts supported on different zeolites**

**Table of contents**

**Fig. S1** DRIFTS spectra of (a) Cu-Mn/ZSM-5 and (b) Cu-Mn/SAPO-34 exposed to 2000 ppm of  $C_3H_6 + 14\% O_2$  and purged by He for 30 min at 200 °C

**Fig. S2** DRIFTS spectra of (a) Cu-Mn/ZSM-5 and (b) Cu-Mn/SAPO-34 exposed to 2000 ppm of  $C_3H_6 + 14\% O_2$  as the background and followed by exposure to 300 ppm of  $NH_3 + 14\% O_2$  for various times at 200 °C

**Fig. S3** DRIFTS spectra of (a) Cu-Mn/ZSM-5 and (b) Cu-Mn/SAPO-34 successively exposed to 2000 ppm of  $C_3H_6 + 14\% O_2$  as the background, and then to 300 ppm of  $NO + 14\% O_2$  before He purging, followed by exposure to 300 ppm of  $NH_3 + 14\% O_2$  for various times at 200 °C

**Fig. S4** DRIFTS spectra of (a) Cu-Mn/ZSM-5 and (b) Cu-Mn/SAPO-34 successively exposed to 2000 ppm of  $C_3H_6 + 14\% O_2$  as the background, and then to 300 ppm of  $NH_3 + 14\% O_2$  before He purging, followed by exposure to 300 ppm of  $NO + 14\% O_2$  for various times at 200 °C

**Fig. S5** Reaction intermediates variation of (a) Cu-Mn/ZSM-5 and (b) Cu-Mn/SAPO-4  
( Reaction conditions: 200 °C, 2000 of ppm  $C_3H_6 + 14\% O_2 \rightarrow 300$  ppm of  $NO + 14\% O_2 \rightarrow 300$  ppm of  $NH_3 + 14\% O_2$  )

**Fig. S6** Reaction intermediates variation of (a) Cu-Mn/ZSM-5 and (b) Cu-Mn/SAPO-4  
( Reaction conditions: 200 °C, 2000 ppm of  $C_3H_6 + 14\% O_2 \rightarrow 300$  ppm of  $NH_3 + 14\% O_2 \rightarrow 300$  ppm of  $NO + 14\% O_2$  )

**Table S1** Physical properties of Cu-Mn/SAPO-34

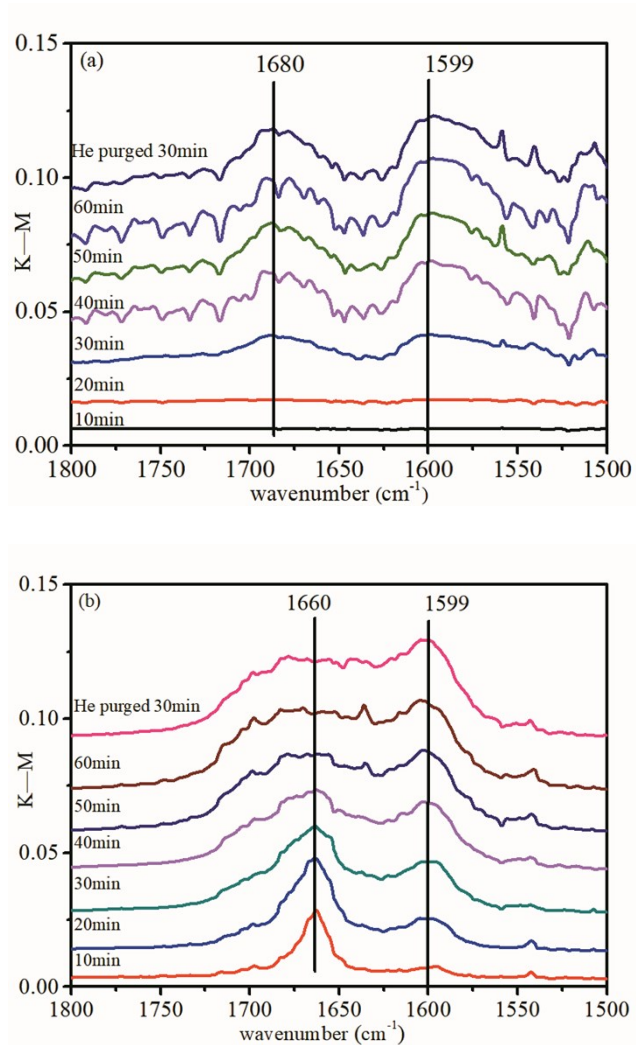

**Fig. S1** DRIFTS spectra of (a) Cu-Mn/ZSM-5 and (b) Cu-Mn/SAPO-34 exposed to 2000 ppm of C<sub>3</sub>H<sub>6</sub>+14% O<sub>2</sub> and purged by He for 30 min at 200 °C

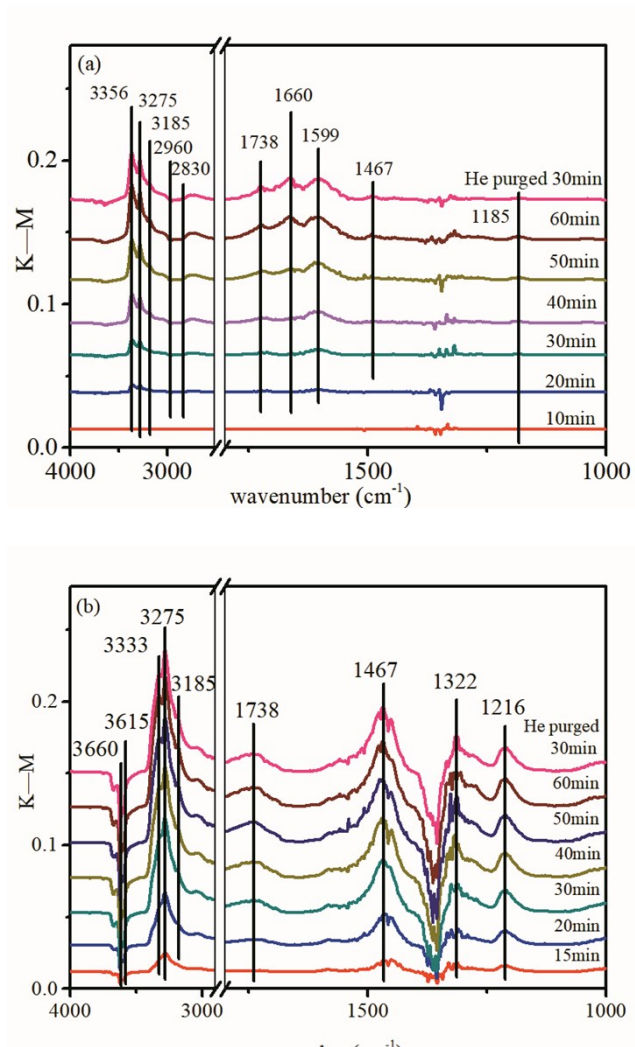

**Fig. S2** DRIFTS spectra of (a) Cu-Mn/ZSM-5 and (b) Cu-Mn/SAPO-34 exposed to 2000 ppm of C<sub>3</sub>H<sub>6</sub> + 14% O<sub>2</sub> as the background and followed by exposure to 300 ppm of NH<sub>3</sub> + 14% O<sub>2</sub> for various times at 200 °C

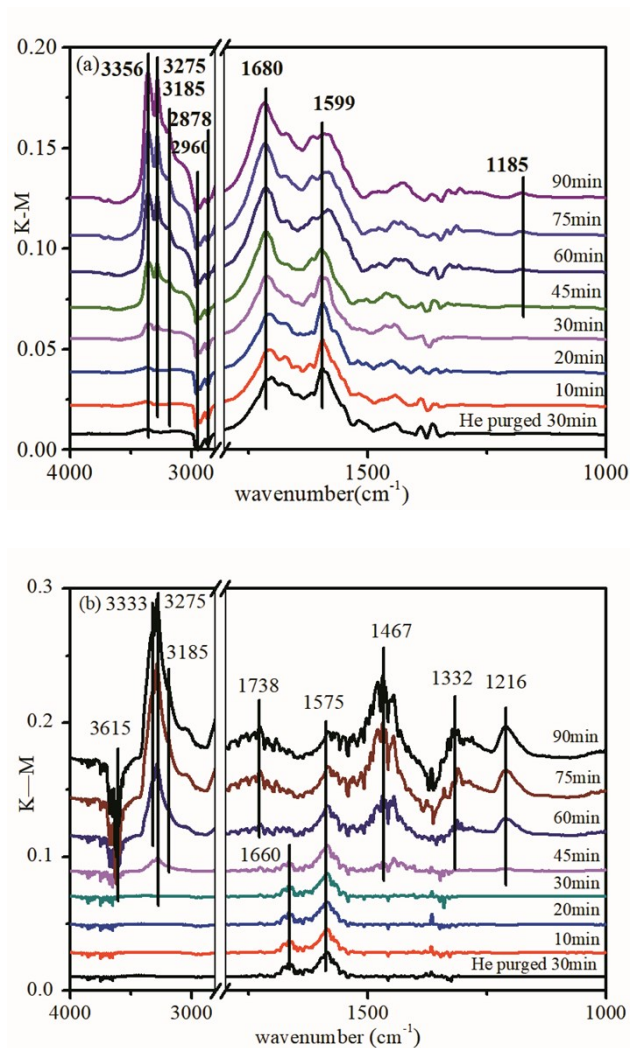

**Fig. S3** DRIFTS spectra of (a) Cu-Mn/ZSM-5 and (b) Cu-Mn/SAPO-34 successively exposed to 2000 ppm of C<sub>3</sub>H<sub>6</sub> + 14% O<sub>2</sub> as the background, and then to 300 ppm of NO + 14% O<sub>2</sub> before He purging, followed by exposure to 300 ppm of NH<sub>3</sub> + 14% O<sub>2</sub> for various times at 200 °C

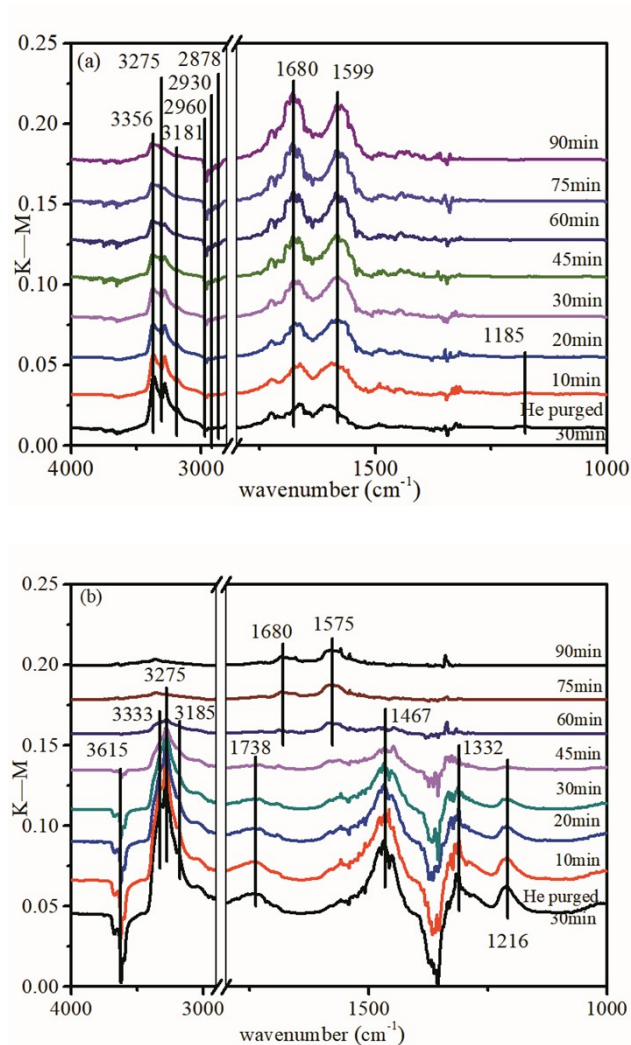

**Fig. S4** DRIFTS spectra of (a) Cu-Mn/ZSM-5 and (b) Cu-Mn/SAPO-34 successively exposed to 2000 ppm of C<sub>3</sub>H<sub>6</sub> + 14% O<sub>2</sub> as the background, and then to 300 ppm NH<sub>3</sub> + 14% O<sub>2</sub> before He purging, followed by exposure to 300 ppm of NO + 14% O<sub>2</sub> for various times at 200 °C

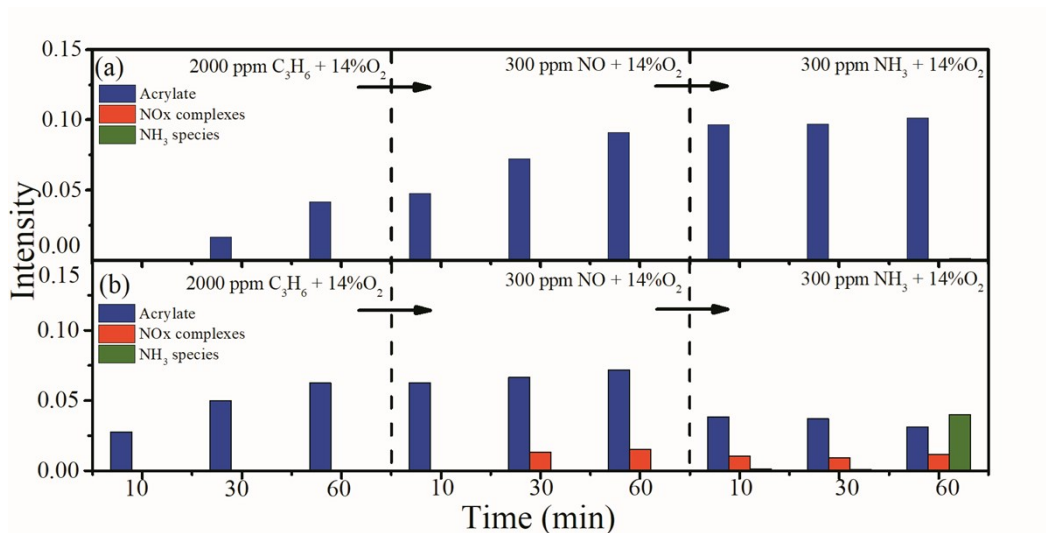

**Fig. S5** Reaction intermediates variation of (a) Cu-Mn/ZSM-5 and (b) Cu-Mn/SAPO-4 (Reaction conditions: 200 °C, 2000 ppm of C<sub>3</sub>H<sub>6</sub> + 14% O<sub>2</sub> → 300 ppm of NO + 14% O<sub>2</sub> → 300 ppm of NH<sub>3</sub> + 14% O<sub>2</sub>)

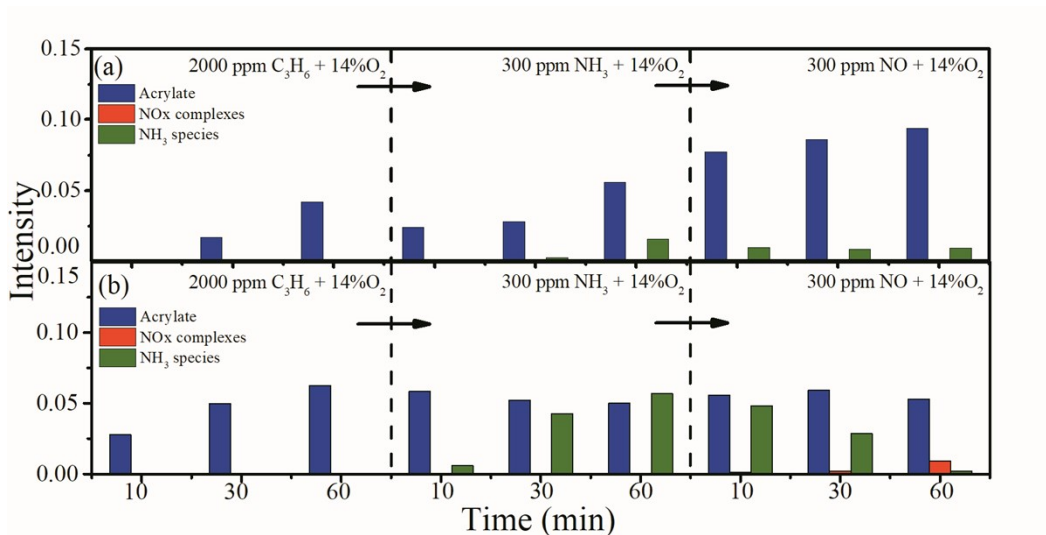

**Fig. S6** Reaction intermediates variation of (a) Cu-Mn/ZSM-5 and (b) Cu-Mn/SAPO-4 (Reaction conditions: 200 °C, 2000 of ppm C<sub>3</sub>H<sub>6</sub> + 14% O<sub>2</sub> → 300 ppm of NH<sub>3</sub> + 14% O<sub>2</sub> → 300 ppm of NO + 14% O<sub>2</sub>)

**Table S1** Physical properties of Cu-Mn/SAPO-34

| Catalyst      | $S_{\text{BET}}$<br>( $\text{m}^2/\text{g}$ ) | Pore volume<br>( $\text{cm}^3/\text{g}$ ) | Average pore diameter<br>( $\text{\AA}$ ) |
|---------------|-----------------------------------------------|-------------------------------------------|-------------------------------------------|
| Cu-Mn/SAPO-34 | 388                                           | 0.14                                      | 4.0                                       |
